# Supplementary material for: Maternal High-Fat Diet-Induced Loss of Fetal Oocytes Is Associated with Compromised Follicle Growth in Adult Rat Offspring
Source: PubMed Central journal article supplement — Biol Reprod. 2016 Mar 9;94(4):94. doi: 10.1095/biolreprod.115.135004 (PMC4861169; doi:10.1095/biolreprod.115.135004), 2016-03-09
Supplement: supp_115.135004_biolreprod.115.135004-1.pdf [file supp_115.135004_biolreprod.115.135004-1.pdf]

## Tsoulis et al., Supplemental Figure Legends

**Supplemental Figure S1. Experimental design of perinatal dietary groups, and postweaning dietary groups.** Abbreviations: CON, maternal control diet; con, postweaning control diet; HF, maternal high fat diet; hf, postweaning high fat diet.

**Supplemental Figure S2. The effect of a postweaning (PW) high fat (HF) diet on follicle counts, activated caspase-3 immunostaining, and circulating FSH, LH, and E<sub>2</sub> in adult offspring at P120.** CON offspring fed a PW HF diet had increased numbers of primordial and type II atretic follicles (a). HF offspring fed a PW HF diet had reduced numbers of type II atretic follicles compared to PW control fed HF offspring (a). There was no PW HF diet effect on activated caspase-3 immunostaining (b), circulating FSH (c), E<sub>2</sub> (d), or the circulating FSH:E<sub>2</sub> ratio (e); however, CON offspring fed a PW HF diet had significantly reduced concentrations of circulating LH (f). Data are presented as mean±SEM - expressed as fold changes relative to control fed CON offspring for follicle counts. Data were analyzed using a two-way ANOVA. Tukey's *post-hoc* analyses: groups with unlike letters are statistically different (p<0.05). n=5-9 per group. Abbreviations: CON, maternal control diet; con, postweaning control diet; HF, maternal high fat diet; hf, postweaning high fat diet; NS, not significant.

**Supplemental Figure S3. The effect of a postweaning (PW) high fat (HF) diet on antral follicle AMH immunostaining and ovarian mRNA expression.** Representative photomicrographs of AMH immunostaining in antral follicles of CON-con, CON-hf, HF-con, and HF-hf offspring (a). Maternal HF diet interacted with a PW HF diet to affect antral follicle AMH immunostaining (b). There was no PW HF diet effect on mRNA expression of *Gdf9*, *Bmp15*, *Dazl*, *Era*, or *Erβ* (c). Data are presented as mean±SEM - expressed as fold changes relative to control fed CON offspring for mRNA expression. Data were analyzed using a two-way ANOVA. Tukey's *post-hoc* analyses: groups with unlike letters are statistically different (p<0.05). n=5-9 per group. Abbreviations: CON, maternal control diet; con, postweaning control diet; HF, maternal high fat diet; hf, postweaning high fat diet; NS, not significant.

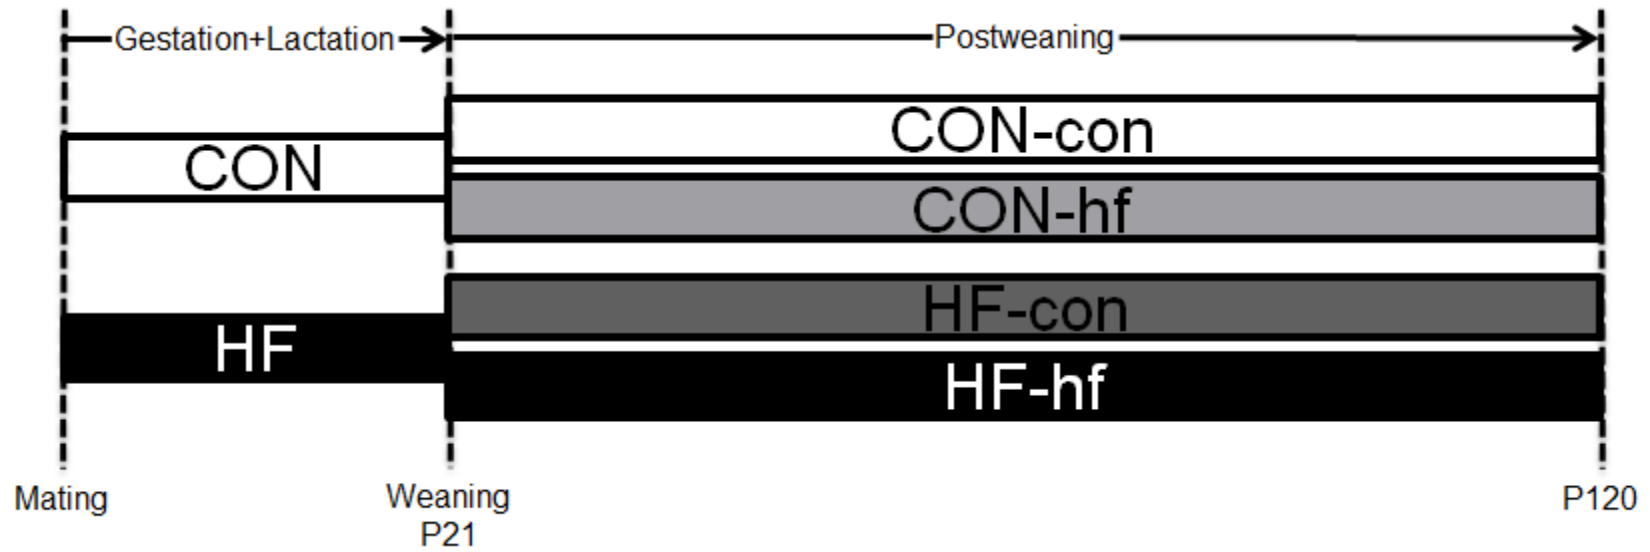

Tsoulis et al., Supplemental Figure S1

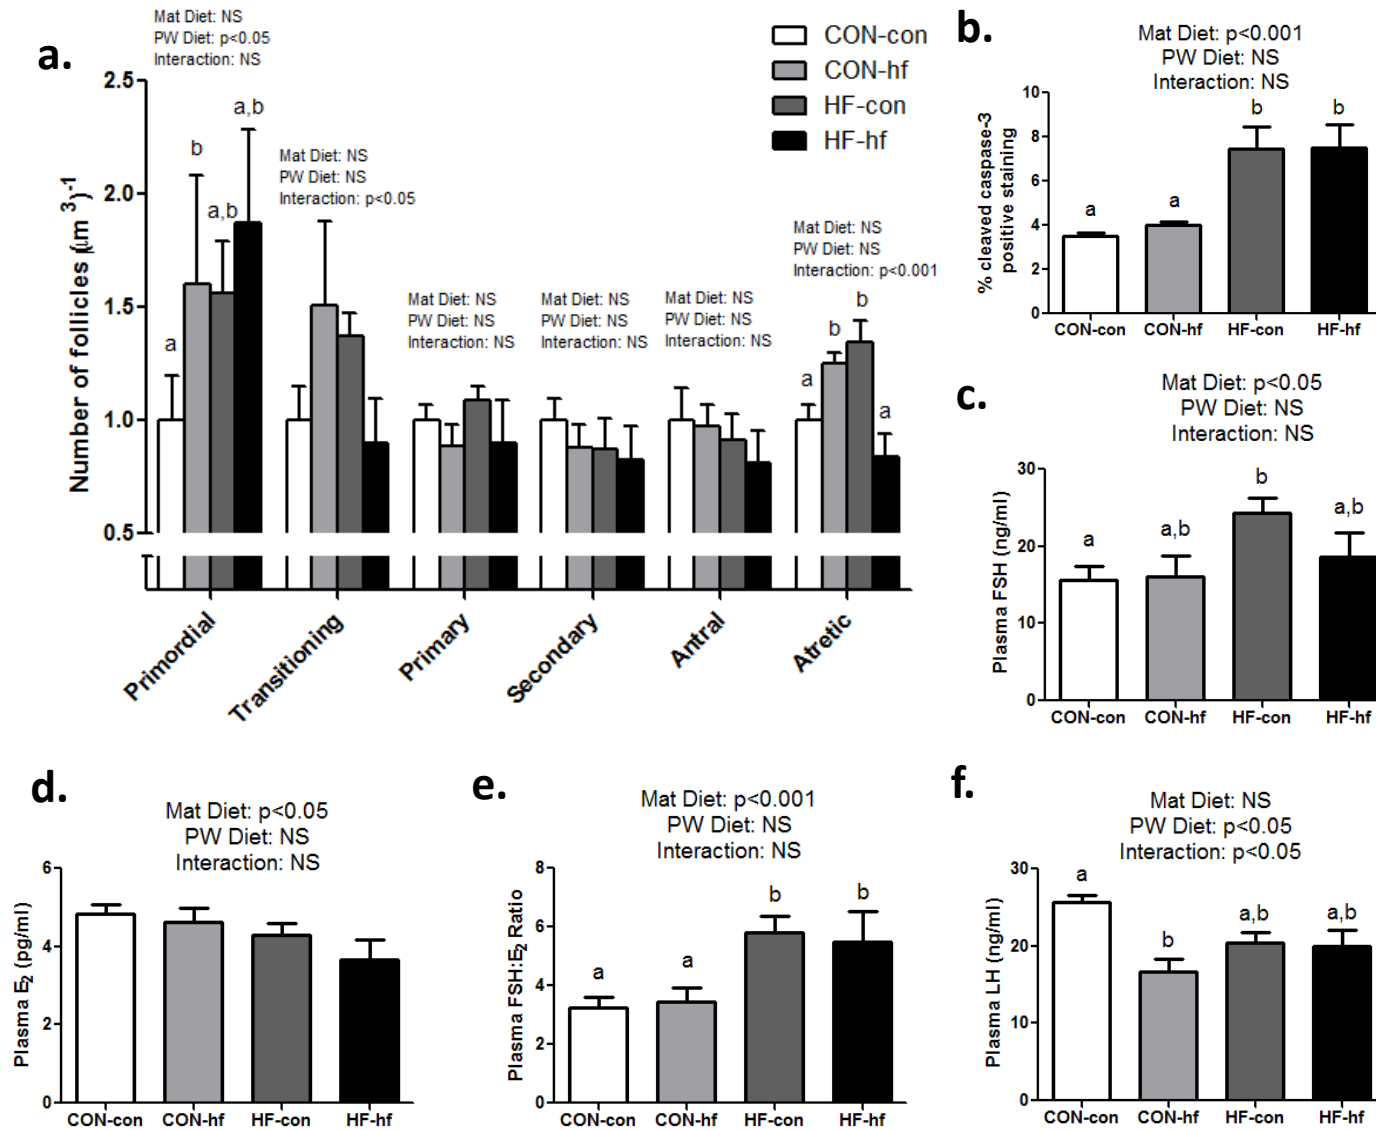

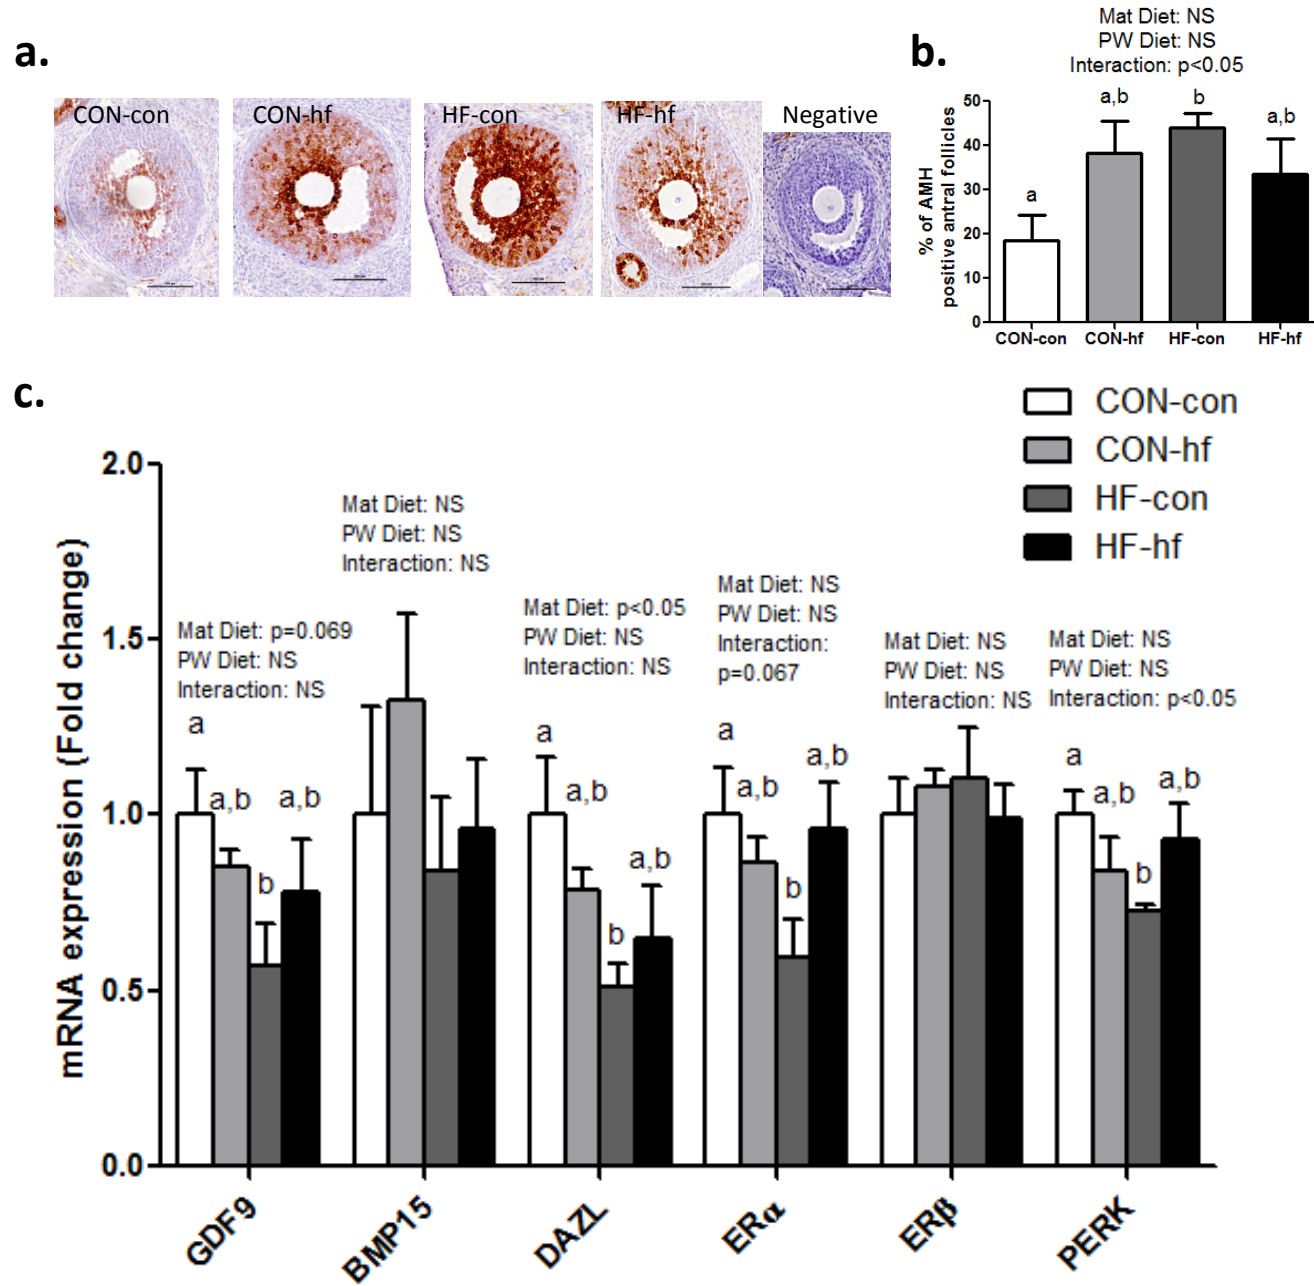

Tsoulis et al., Supplemental Table S1. Primer information.

| Gene            | Forward Primer           | Reverse Primer          | Amplicon length (bp) | GenBank Accession Number |
|-----------------|--------------------------|-------------------------|----------------------|--------------------------|
| Ywhaz           | TTGTAGGAGCCCGTAGGTCA     | AAAGAGACAGTACGTCGTTGC   | 152                  | NM_013011.3              |
| Ywhag           | TTCCTAAAGCCCTTCAAGGCA    | GGCTTTCTGCACTAGTTGGTCG  | 101                  | NM_019376.2              |
| $\beta$ -actin  | CACTTTCTACAATGAGCTGCGTGT | CTGGATGGCTACGTACATGGCT  | 148                  | NM_031144.3              |
| B2M             | AATTCACACCCACCGAGACC     | GTCCTTCAGAGTGACGTGT     | 63                   | NM_012512.2              |
| SDHA            | TGGGGCGACTCGTGGCTTTC     | CCCCGCCTGCACCTACAAGC    | 134                  | NM_130428.1              |
| HPRT            | GCAGTACAGCCCCAAAATGG     | GGTCCTTTTACCAGCAAGCT    | 52                   | NM_012583.2              |
| Cyclophilin     | CCGCTGTCTCTTTTCGCC       | GCTGTCTTTGGAACCTTGTCTGC | 129                  | NM_017101.1              |
| GDF9            | CAACCAGATGACAGGACCCC     | CACAGTGGAGGAGGAAGCAG    | 133                  | NM_021672.1              |
| BMP15           | TGATAAAGCCGTCAGCCAGT     | TCTGTATATGCCAAGGACCTCT  | 57                   | NM_021670.1              |
| DAZL            | TGCTCCAGCCTCTGGAAATG     | GCACTGCCGACTTCTTCTA     | 170                  | NM_001109414.1           |
| ER- $\alpha$    | TCCTGGACAAGATCAACGACACT  | TGCAGAGTCAGGCCAGCTT     | 61                   | NM_012689.1              |
| ER- $\beta$     | CCTGCCGACTTCGCAAGT       | CCACACCGTTCTCTCTGGAT    | 67                   | NM_012754.1              |
| PERK            | TACAGTGGACGGCGATGATGAG   | CTTAGGGTGGTTCGCCTGGTAG  | 270                  | NM_031599.2              |
| Star            | TATTGACCTCAAGGGGTGGC     | CAAGTGGCTGGCGAACTCTA    | 82                   | NM_031558.3              |
| Cyp11a1         | TCCTCTACCAACAGTCCTCGAT   | TGCCCAGCTTCTCCTGTAAT    | 166                  | NM_017286.2              |
| Cyp19a1         | ATTGGCATGCACGAGAATGG     | TGCTGCTTATGATTCCAC      | 139                  | NM_017085.2              |
| Cyp17a1         | TCTGTGCTATCTGCTTCAACATCT | GCCTTTGTTGGGAAAAATCGTC  | 149                  | NM_012753.2              |
| 3 $\beta$ HSDI  | TCATGATACTTGGGCCCTC      | AGCCAGAATATGTGCCCAGG    | 118                  | NM_001007719.3           |
| 17 $\beta$ HSD1 | CGGGATCTGAAGTCACAGGG     | GCGTCCAGCATTACAGACCAG   | 171                  | NM_012851.2              |
| FSHR            | TTCAACGGAAGTCTAGTAGATG   | TGGTTTGGTAAGGAATGGACC   | 145                  | NM_199237.1              |
| LHR             | TATGCTCGGAGGATGGCTCT     | AGCACAGATGACGACGAAGG    | 175                  | NM_012978.1              |
